# Supplementary material
Source: PubMed Central journal article supplement (PMC8749181)
Supplement: mmc1.pdf [file mmc1.pdf]

iScience, Volume 25

**Supplemental information**

**Distinct codon usage bias evolutionary  
patterns between weakly and strongly  
virulent respiratory viruses**

**Feng Chen and Jian-Rong Yang**

## Supplementary figures

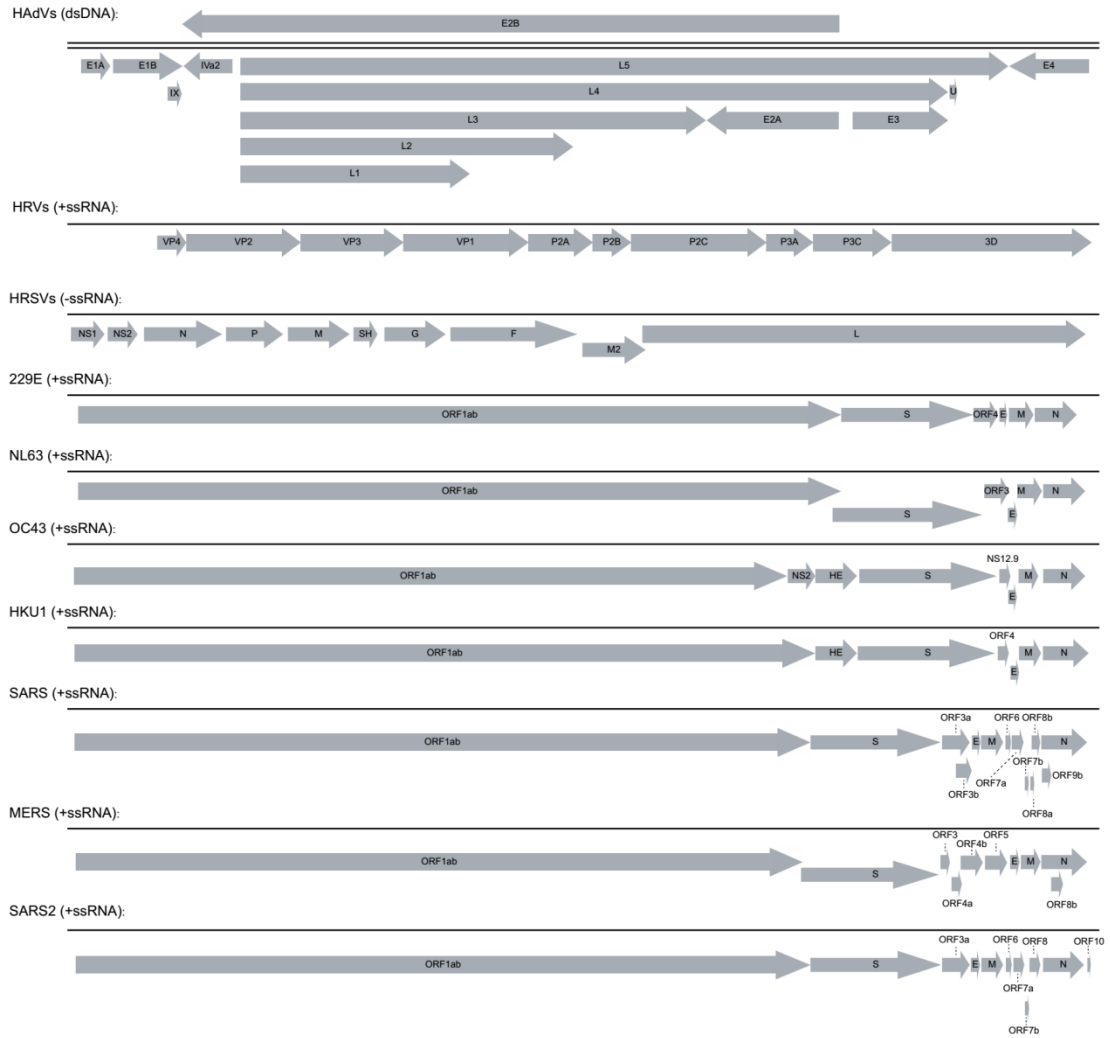

**Figure S1.** The genome structure of viruses analyzed in this paper, related to Figure 1-4. The gray boxes represent loci of genes in each virus.
